# Supplementary material for: Controlled synthesis of ultrathin MoS2nanoflowers for highly enhanced NO2sensing at room temperature
Source: Royal Society of Chemistry journal article supplement (doi:10.1039/d0ra00121j), 2020-01-01
Supplement: d0ra00121j1.pdf [file d0ra00121j1.pdf]

# Supporting Information

## Controlled synthesis of ultrathin MoS<sub>2</sub> nanoflowers for highly enhanced NO<sub>2</sub> sensing at room temperature

Nguyen Tat Thang<sup>1</sup>, Le Thi Hong<sup>1</sup>, Nguyen Hoang Thoan<sup>2</sup>, Chu Manh Hung<sup>1,\*</sup>, Nguyen Van Duy<sup>1,\*\*</sup>, Nguyen Duc Hoa<sup>1</sup>, and Nguyen Van Hieu<sup>3,4</sup>

<sup>1</sup>International Training Institute for Materials Science (ITIMS), Hanoi University of Science and Technology (HUST), No 1 - Dai Co Viet Str. 100000 Hanoi, Vietnam

<sup>2</sup>School of Engineering Physics, Hanoi University of Science and Technology (HUST), No 1 - Dai Co Viet Str. 100000 Hanoi, Vietnam

<sup>3</sup>Faculty of Electrical and Electronic Engineering, Phenikaa Institute for Advanced Study (PIAS), Phenikaa University, Yen Nghia, Ha-Dong district, 100000 Hanoi, Viet Nam;

<sup>4</sup>Phenikaa Research and Technology Institute (PRATI), A&A Green Phoenix Group, 167 Hoang Ngan, 100000 Hanoi, Viet Nam.

Corresponding author:

\* [mhchu@itims.edu.vn](mailto:mhchu@itims.edu.vn); [hung.chumanh@hust.edu.vn](mailto:hung.chumanh@hust.edu.vn) (C. M. Hung)

\*\*[nguyenvanduy@itims.edu.vn](mailto:nguyenvanduy@itims.edu.vn); [duy.nguyenvan@hust.edu.vn](mailto:duy.nguyenvan@hust.edu.vn) (N. V. Duy)

International Training Institute for Materials Science (ITIMS),

Hanoi University of Science and Technology (HUST)

No. 1 - Dai Co Viet Str., 100000 Hanoi, Vietnam

Phone: 84 24 38680787

Fax: 84 24 38692963

The setup for gas sensing measurement is illustrated in Fig. S1, in which we employed three mass flow controllers (MFC) for the gas mixing

In the current work, the total gas flow rate was set to 400 sccm and the standard NO<sub>2</sub> gas with concentration of 100 ppm balanced in nitrogen was used. To obtain the desired NO<sub>2</sub> concentrations we mixed the the NO<sub>2</sub> standard gas with press air using MFC-1 and MFC-2 with different flow rates as shown in Table. S1.

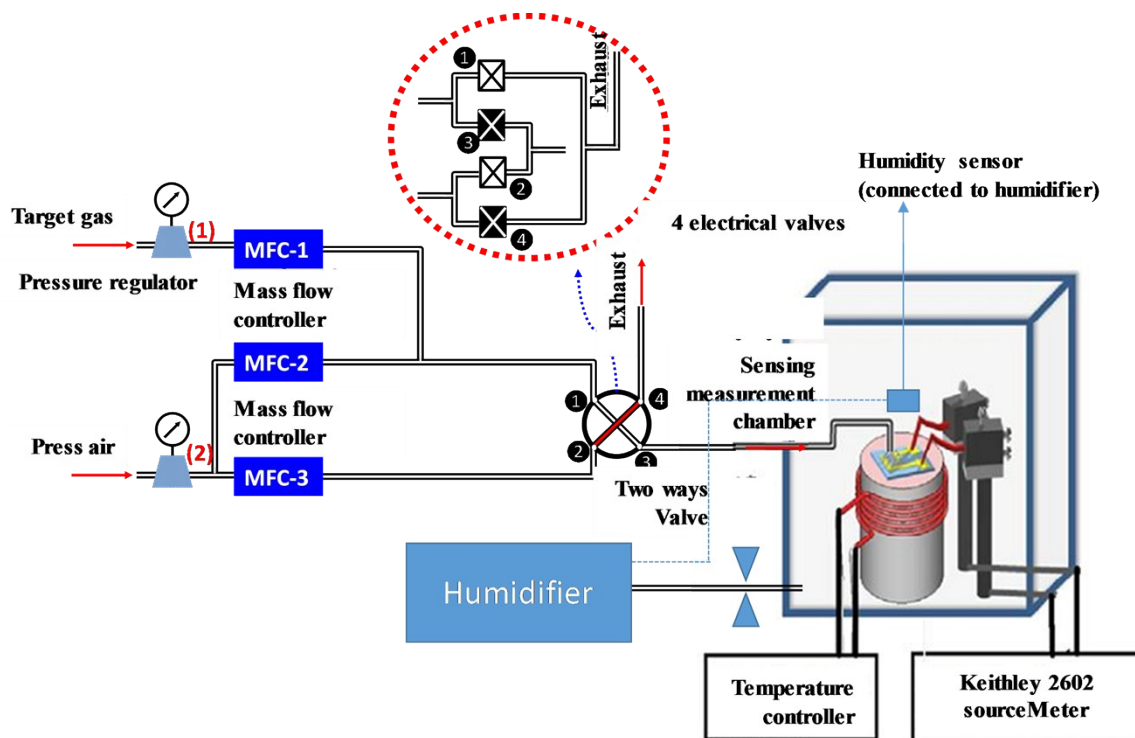

**Figure S1.** Schematic diagram of the gas sensing measurement setup

**Table S1.** NO<sub>2</sub> gas concentration range obtained by using mass flower controllers

| MFC-3 (sccm) | MFC-2 (sccm) | MFC-1 (sccm) | Concentration (ppm) |
|--------------|--------------|--------------|---------------------|
| 400          | 396          | 4            | 1                   |
| 400          | 390          | 10           | 2.5                 |
| 400          | 380          | 20           | 5                   |
| 400          | 360          | 40           | 10                  |

The specific surface areas of the MoS<sub>2</sub> grown for different times were measured by using BET method by N<sub>2</sub> adsorption isotherm at the relative pressure ( $P/P_0$ ) range of 0.05–0.3. The N<sub>2</sub> adsorption quantities of the synthesized MoS<sub>2</sub> nanostructures under different growth times of 24, 36, 48, and 60 h as a function of relative pressure are shown Figs. S2(a), (b), (c), (d), respectively.

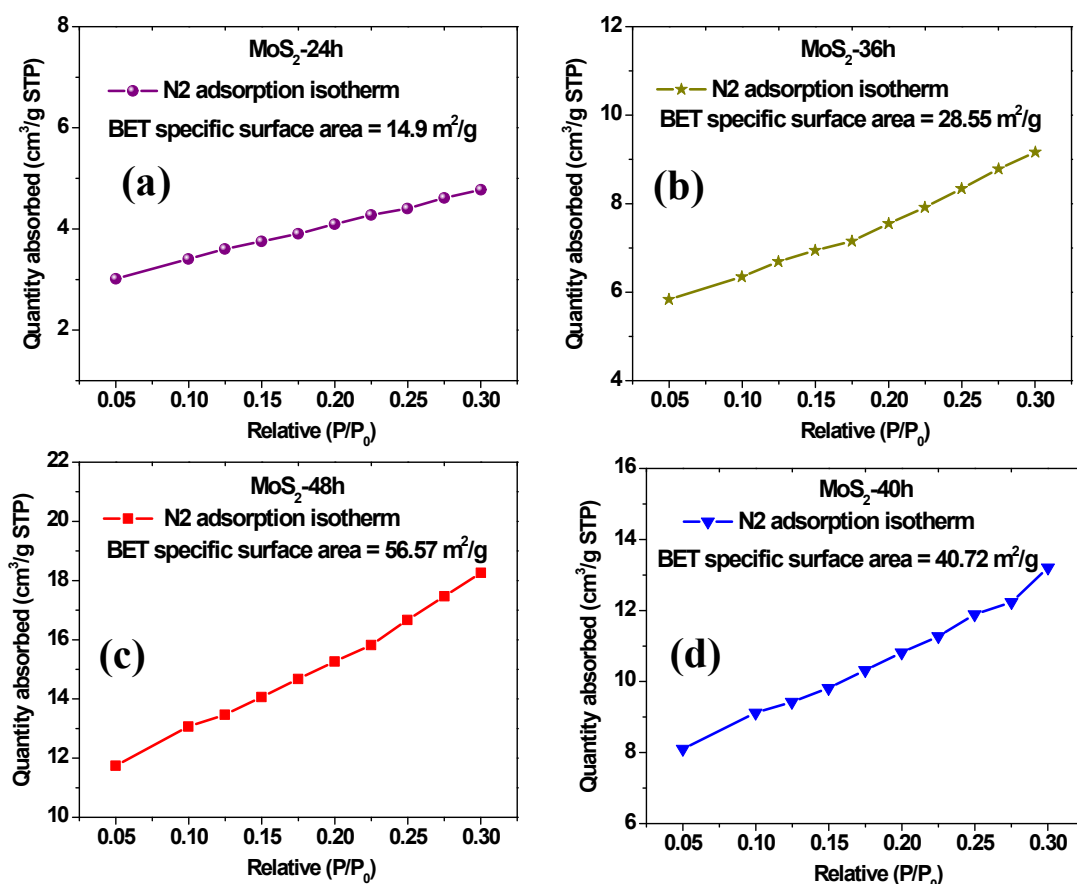

**Figure S2.** N<sub>2</sub> adsorption quantities of the MoS<sub>2</sub> nanostructure grown for (a) 24 h, (b) 36 h, (c) 48 h, and (d) 60 h as a function of relative pressure.

Figs. S3(a)-(d) reveal the transient resistances of the sensor based on the MoS<sub>2</sub> grown for 24 h to 1–10 ppm NO<sub>2</sub> at room temperature (RT), 50, 100, and 150 °C, respectively. The data show similar behavior compared to that of the sensor based on the MoS<sub>2</sub>–24h sample. Namely, the resistance of the sensor decreased with increasing the temperature, indicating the semiconducting characteristics of the synthesized MoS<sub>2</sub>. Upon an exposure to oxidizing NO<sub>2</sub> gas, the sensor's

resistance decreased, confirmed the  $p$ -type semiconducting behavior. Fig. S3(e) summarizes the gas response values of the sensor based on the MoS<sub>2</sub>-24h as a function of the NO<sub>2</sub> concentration. Results reveal highest gas response of the sensor to NO<sub>2</sub> gas reached at room temperature.

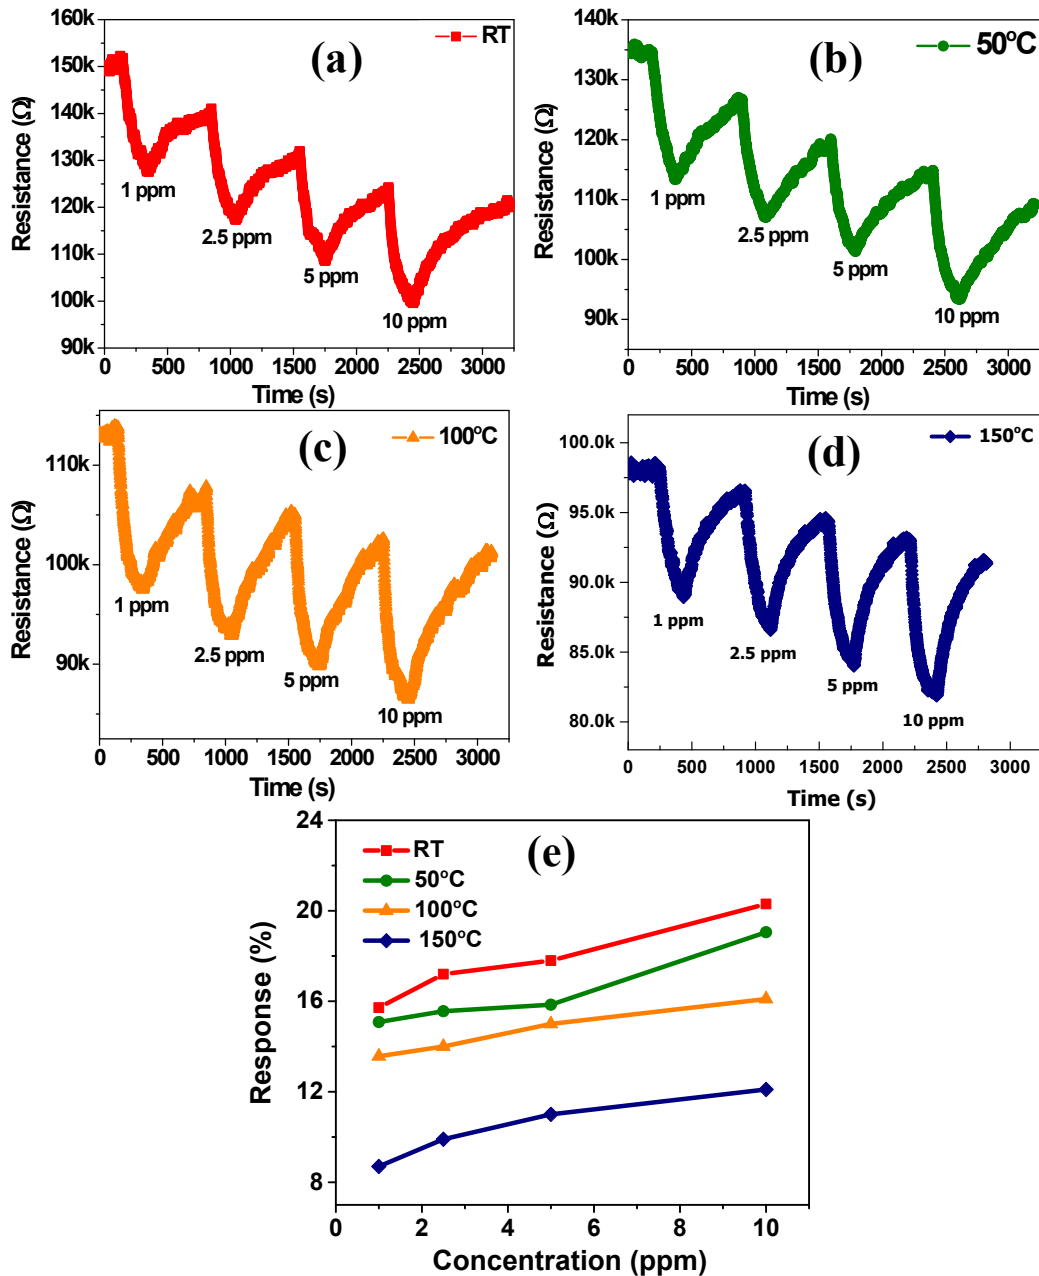

**Figure S3.** (a)–(d) Transient resistances of the sensor based on the MoS<sub>2</sub> grown for 24 h to 1–10 ppm NO<sub>2</sub> at RT, 50, 100, and 150 °C, respectively. (e) Gas response of the sensor as a function of NO<sub>2</sub> gas concentration at different temperatures.

Similarly, Figs. S4 and S5 show the NO<sub>2</sub> sensing results of the sensors based on the MoS<sub>2</sub>-36h and the MoS<sub>2</sub>-60h samples, respectively. Highest response of both samples to NO<sub>2</sub> gas are also obtained at room temperature.

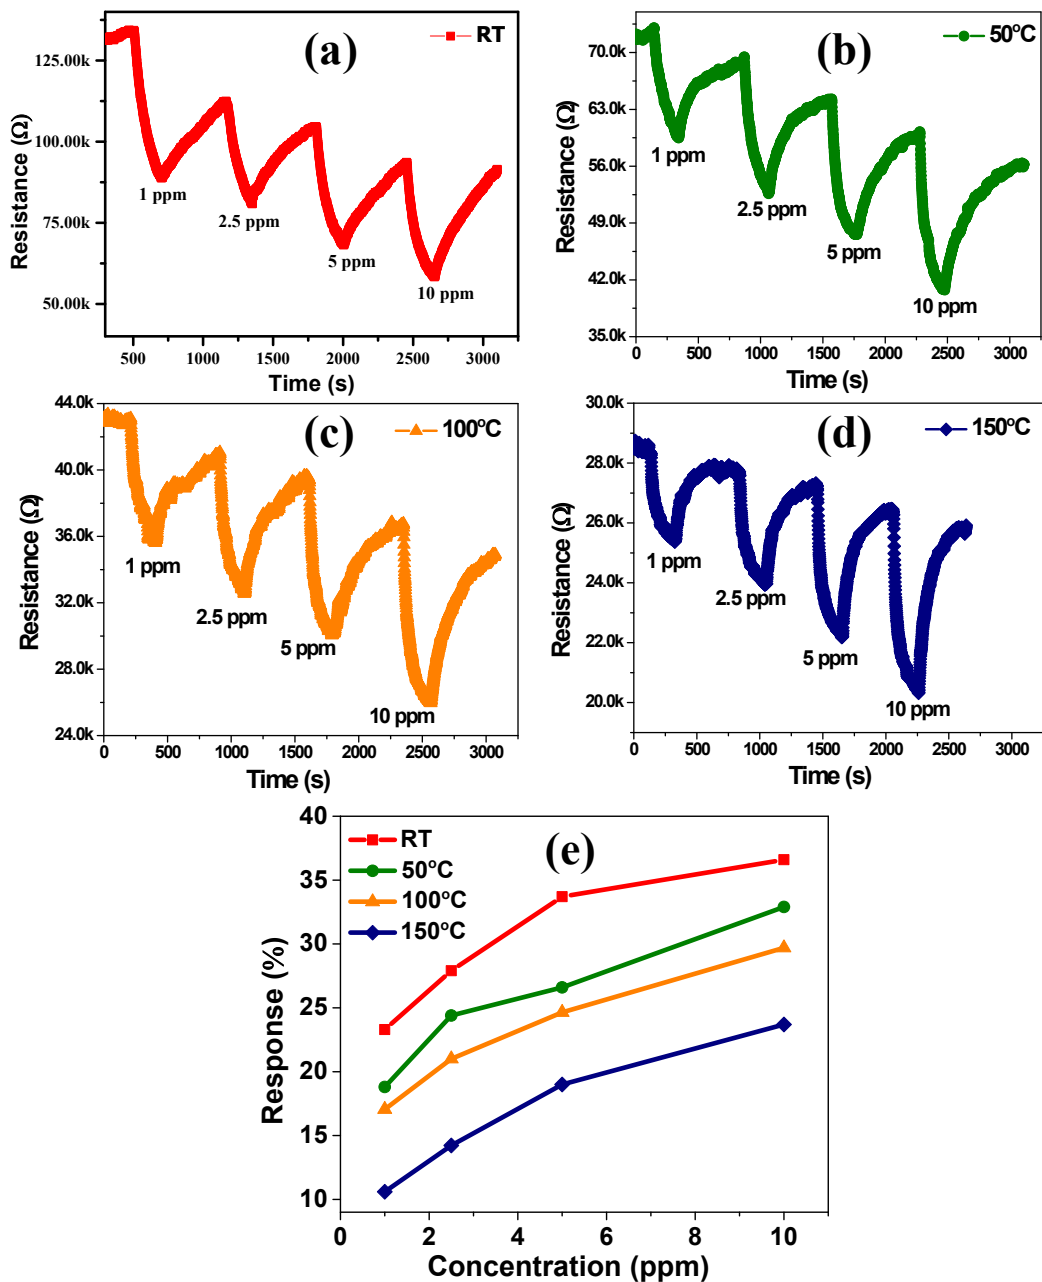

**Figure S4.** (a)–(d) Transient resistances of the sensor based on the MoS<sub>2</sub> grown for 36 h to 1–10 ppm NO<sub>2</sub> at RT, 50, 100, and 150 °C, respectively. (e) Gas response of the sensor as a function of NO<sub>2</sub> gas concentration at different temperatures.

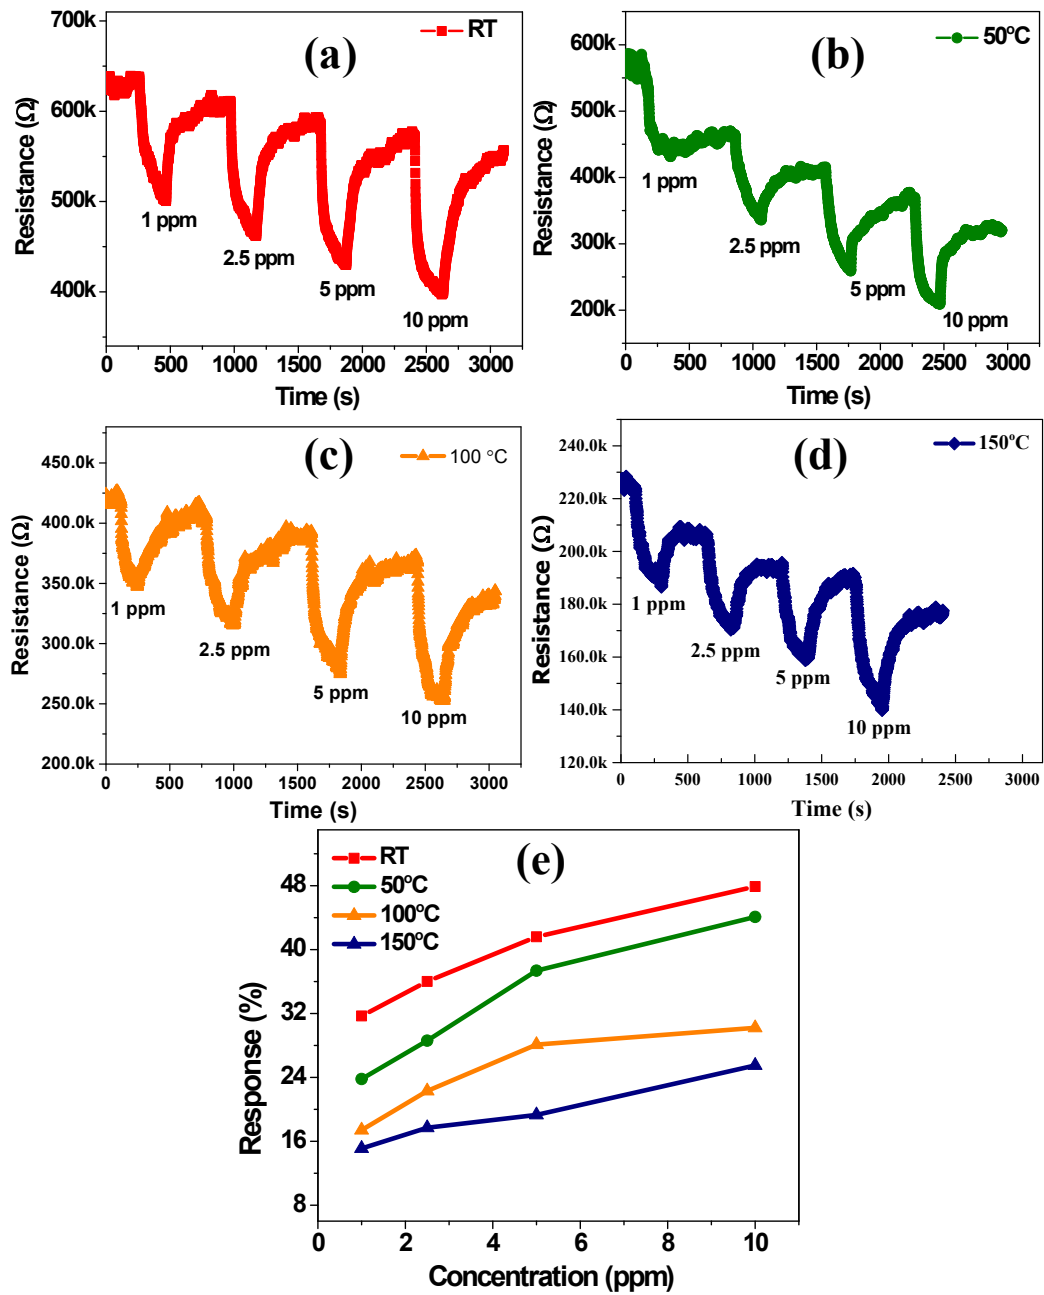

**Figure S5.** (a)–(d) Transient resistances of the sensor based on the MoS<sub>2</sub> grown for 36 h to 1–10 ppm NO<sub>2</sub> at RT, 50, 100, and 150 °C, respectively. (e) Gas response of the sensor as a function of NO<sub>2</sub> gas concentration at different temperatures.

The gas selectivity of the sensor based on the MoS<sub>2</sub>-48h was tested to various gases of both oxidizing and reducing gases of different concentrations at RT. Figs. S6 (a)-(e) exhibit the transient resistances of the sensor to NH<sub>3</sub>, CO, H<sub>2</sub>, CH<sub>4</sub>, and SO<sub>2</sub> at RT. While Fig. S6 (f) shows the NO<sub>2</sub> response of the MoS<sub>2</sub>-48h sensor at RT as a function of the relative humidity.

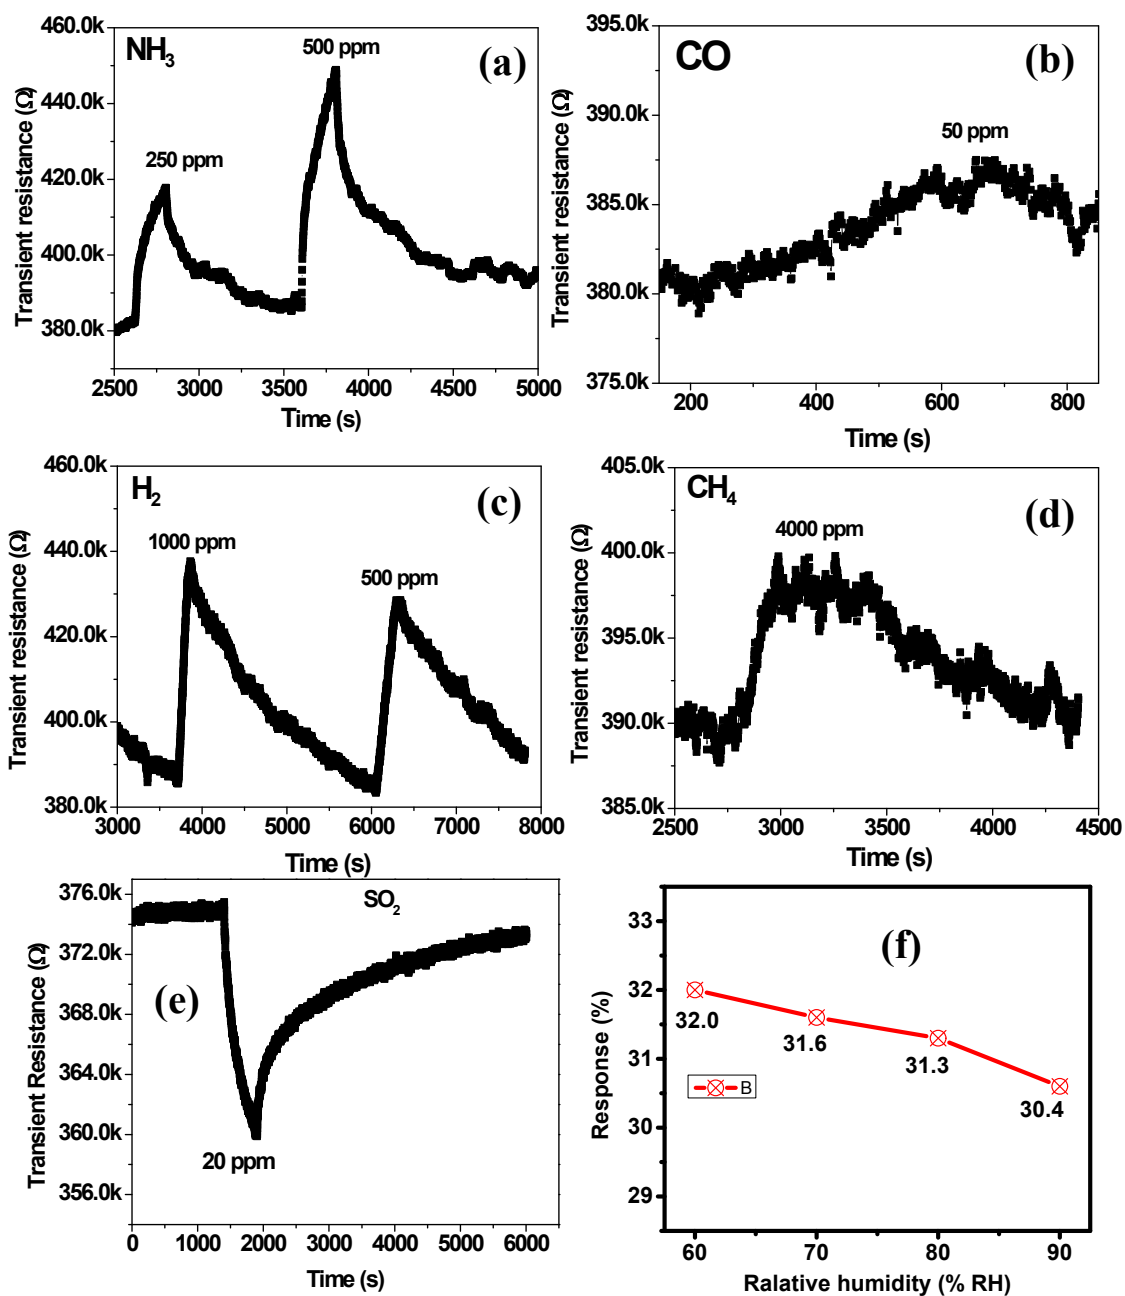

**Figure S6.** (a)-(e) The transient resistances of the sensor to NH<sub>3</sub>, CO, H<sub>2</sub>, CH<sub>4</sub>, and SO<sub>2</sub> at RT. (f) NO<sub>2</sub> gas response of the MoS<sub>2</sub>-48h sensor at RT as a function of the relative humidity.
